# Supplementary material for: Position of Circulating Tumor Cells in the Clinical Routine in Prostate Cancer and Breast Cancer Patients
Source: PubMed Central journal article supplement (PMC7765455; doi:10.3390/cancers12123782), 2020-12-15
Supplement: cancers-12-03782-s001.pdf [file cancers-12-03782-s001.pdf]

SupplementaryMaterials:

## Position of Circulating Tumor Cells in the Clinical Routine in Prostate Cancer and Breast Cancer Patients

Gerit Theil, Paolo Fornara and Joanna Bialek

Table S1. Main clinical Trials for Prostate Cancer.

| Prostate Cancer Typ   | Clinical Trial                          | CTC functional characterisation additional to enumeration                                               | Isolation technic other than CellSearch | Reference              |
|-----------------------|-----------------------------------------|---------------------------------------------------------------------------------------------------------|-----------------------------------------|------------------------|
| mCRPC                 | SWOG S0421                              | Telomerase activity                                                                                     |                                         | [22], [38]             |
|                       | MAINSAIL                                |                                                                                                         |                                         | [25]                   |
|                       | COU-AA-301                              |                                                                                                         |                                         | [26], [28], [29], [31] |
|                       | ELM-PC4                                 |                                                                                                         |                                         | [26]                   |
|                       | IMMC38/AFFIRM/ELM-PC-5/ ELM-PC-4/ COMET |                                                                                                         |                                         | [30]                   |
| mCRPC                 | Phase II                                | PSMA-Expression                                                                                         | Epic Science                            | [41], [42]             |
|                       | pharmacodynamic study radium-223        | RNA expression of osteoblast regulators (ALPL, osteopontin, osteocalcin, OB-cadherin, RANKL, and SPARC) | RosetteSep                              | [43]                   |
|                       | Registered study                        | mRNA AR-VL and AR-V7                                                                                    | AdnaTest                                | [49], [50], [51]       |
|                       | PROPHECY                                | mRNA AR-V7 vs nuclear specific AR-V7 protein assay                                                      | AdnaTest vs Epic Science                | [52]                   |
|                       | TAXYNERGY                               | % AR nuclear localization + tubulin b                                                                   | GEDI                                    | [53]                   |
|                       | Registered study                        | nuclear expression of AR-V7                                                                             | Epic Sciences                           | [55]                   |
| Hormone-sensitive PCA | Registered study                        | CTC mathematical phenotype identification and Shannon index                                             | Epic Sciences                           | [56]                   |
|                       | SWOG 0925                               |                                                                                                         |                                         | [30]                   |

Table S2. Main clinical Trials for Breast Cancer.

| Tumor status | Clinical Trial   | CTC functional characterisation additional to enumeration                                                      | Isolation technic other than CellSearch                                             | Reference                          |
|--------------|------------------|----------------------------------------------------------------------------------------------------------------|-------------------------------------------------------------------------------------|------------------------------------|
|              | SUCCESS          | HER2                                                                                                           |                                                                                     | [70, 76, 77, 79, 99, 100]          |
|              |                  |                                                                                                                | density gradient,                                                                   | [92]                               |
|              | NeoALTTO         | Her2                                                                                                           |                                                                                     | [78]                               |
| PBC          | BEVERLY-2        | HER2 / no additional staining                                                                                  |                                                                                     | [96]                               |
|              | NEOZOL           |                                                                                                                |                                                                                     | [94] / [97]                        |
|              | TREAT-CTC-Studie | HER2                                                                                                           |                                                                                     | [80]                               |
|              | Registered study | MUC1, HER-2, TWIST1, AKT2, PI3KA, ALDH1, CD44, BMI1                                                            | AdnaTest                                                                            | [95]                               |
|              | Registered study |                                                                                                                |                                                                                     | [105]                              |
|              | OnSITE           |                                                                                                                |                                                                                     | [75], [82]                         |
|              | CAMELLIA         | Vimentin and Twist                                                                                             | CanPatrol                                                                           | [72]                               |
|              | TBCRC            | M-30                                                                                                           |                                                                                     | [104]                              |
|              | CirCe01          |                                                                                                                |                                                                                     | [101]                              |
| MBC          | LANDSCAPE        | CK19mRNA+                                                                                                      |                                                                                     | [67]                               |
|              | Registered study | HER-2 /vimentin and pan-cytokeratin /HER-2 /HER-2, ER /whole genome amplification; ESR1 gene mutation analysis | immuno /Microfluidic Chip /AdnaTest vs. CellSearch /immuno-phenotype (FAST) /Immuno | [85]                               |
|              | Registered study | CK19mRNA+ / M30 and Bcl2 / M30/M65 / HorR/ HER2                                                                |                                                                                     | [83] / [106] / [93] / [87] / [86]  |
|              | Registered study |                                                                                                                |                                                                                     | [63] / [103] / [102] / [61]        |
|              | Registered study |                                                                                                                |                                                                                     | [65], [60], [68], [74], [64], [76] |

**Publisher’s Note:** MDPI stays neutral with regard to jurisdictional claims in published maps and institutional affiliations

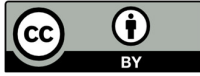

© 2020 by the authors. Licensee MDPI, Basel, Switzerland. This article is an open access article distributed under the terms and conditions of the Creative Commons Attribution (CC BY) license (<http://creativecommons.org/licenses/by/4.0/>).
